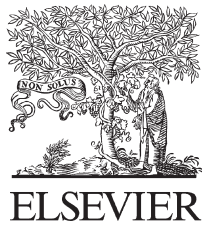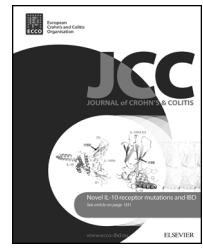

# Family history of inflammatory bowel disease among patients with ulcerative colitis: A systematic review and meta-analysis

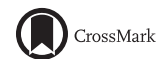

Ryan E. Childers<sup>a,\*</sup>, Swathi Eluri<sup>b</sup>, Christine Vazquez<sup>c</sup>,  
Rayna Matsuno Weise<sup>d</sup>, Theodore M. Bayless<sup>c</sup>, Susan Hutfless<sup>c</sup>

<sup>a</sup> Division of Gastroenterology, Oregon Health and Science University, 3181 SW Sam Jackson Park Road, Portland, OR 97239, USA

<sup>b</sup> Department of Medicine, Johns Hopkins University, 601 North Caroline Street, Baltimore, MD 21287, USA

<sup>c</sup> Division of Gastroenterology & Hepatology, Department of Medicine, Johns Hopkins University, 600N Wolfe St, Baltimore, MD 21287, USA

<sup>d</sup> Bloomberg School of Public Health, Johns Hopkins University, USA

Received 28 March 2014; received in revised form 3 May 2014; accepted 31 May 2014

## KEYWORDS

Ulcerative colitis;  
Inflammatory bowel disease;  
Family history;  
Prevalence;  
Meta-analysis

## Abstract

**Background and aims:** Despite numerous shared susceptibility loci between Crohn's disease and ulcerative colitis, the prevalence of family history among ulcerative colitis patients is not well-established and considered to be less prevalent. A systemic review and meta-analysis were conducted to estimate the prevalence of family history of inflammatory bowel disease in ulcerative colitis patients, and its effect on disease outcomes.

**Methods:** PubMed was searched to identify studies reporting the prevalence of family history of inflammatory bowel disease among ulcerative colitis patients. Definitions of family history, study type, and subtypes of family history prevalence were abstracted, as were disease outcomes including age at ulcerative colitis diagnosis, disease location, surgery and extraintestinal manifestations. Pooled prevalence estimates were calculated using random effects models.

**Results:** Seventy-one studies (86,824 patients) were included. The prevalence of a family history of inflammatory bowel disease in ulcerative colitis patients was 12% (95% confidence interval [CI] 11 to 13%; range 0–39%). Family history of ulcerative colitis (9%; 22 studies) was more prevalent than Crohn's disease (2%; 18 studies). Patients younger than 18 years of age at time of diagnosis had a greater family history of inflammatory bowel disease (prevalence 15%, 95% CI: 11–20%; 13 studies). There were no differences in disease location, need for surgery, or extraintestinal manifestations among those with a family history, although very few studies reported on these outcomes.

\* Corresponding author. Tel.: +1 480 239 8145; fax: +1 503 494 8776.

E-mail address: [childerr@ohsu.edu](mailto:childerr@ohsu.edu) (R.E. Childers).

*Conclusions:* Overall, 12% of ulcerative colitis patients have a family history of inflammatory bowel disease, and were more likely to have a family history of ulcerative colitis than Crohn's disease. Pediatric-onset ulcerative colitis patients were more likely to have a family history of inflammatory bowel disease.

© 2014 European Crohn's and Colitis Organisation. Published by Elsevier B.V. All rights reserved.

## 1. Introduction

Ulcerative colitis (UC) is the most common form of inflammatory bowel disease (IBD), followed by Crohn's disease (CD). IBD is thought to have a multifactorial etiopathogenesis involving environmental and genetic factors. Family history is a composite of shared environmental exposures and genetic factors. An increased risk of IBD among family members was first suspected nearly 50 years ago; in more recent studies of family history in IBD, a greater proportion of CD patients have a family history than UC patients.<sup>1–3</sup> This difference is most pronounced in twin studies, where participants have shared genes and similar early life environments. Among monozygotic twins, concordance for IBD is 50 to 60% in CD compared with 6 to 18% in UC.<sup>4</sup> Concordance rates for dizygotic twins are 12% in CD and 5% in UC.<sup>4</sup>

In recent years, genome-wide association studies (GWAS) have identified over 160 loci associated with IBD.<sup>5</sup> Some studies have shown that as many as 47 loci are predominantly associated with UC, 71 loci are predominantly associated with CD<sup>5–8</sup> and 28 loci are shared between UC and CD.<sup>8</sup> Despite numerous shared susceptibility loci between CD and UC, the prevalence of family history among UC patients is not well-established and considered to be less prevalent.

Therefore, we aimed to estimate the prevalence of a family history of IBD among patients with UC. We also aimed to examine the relationship between family history with age at diagnosis, disease severity and location and extraintestinal manifestations.

## 2. Materials and methods

### 2.1. Data sources and search strategy

We searched PubMed in September 2010 with no restriction to publication date using the following search strategy: ("ulcerative colitis" OR "UC" OR "IBD" OR "inflammatory bowel disease") AND ("family history" OR "family" OR "familial" OR "kindred" OR "twin" OR "inherited" OR "hereditary" OR "sibling" OR "parents") NOT ("rat" OR "mouse" OR "murine").

### 2.2. Study selection

Two reviewers independently reviewed titles and abstracts. We included titles that appeared to report original research on IBD. Only one reviewer had to identify a study as potentially relevant to progress to the abstract review. We included abstracts that either explicitly reported on family history or were original research (including trials, observational studies, and genetics studies) that were likely to include a table on patient characteristics that might include

family history. Both reviewers had to agree that the study was eligible at the abstract level for the full text to be reviewed. To be eligible for inclusion during the full text review, the study was required to report on the family history of IBD, UC or CD among UC patients. All studies that met the inclusion criteria at the full-text review had data abstracted by one reviewer with a second reviewer confirming the data abstraction.

As a quality control measure, a senior investigator reviewed 100 publications at the title and abstract levels and confirmed the inclusion/exclusion of studies with the reviewers to ensure that consistent inclusion and exclusion criteria were applied. Conflicts between reviewers during the abstract, full text review and data abstraction were resolved by consensus including a senior investigator.

### 2.3. Outcomes of interest

The primary outcome was prevalence of a family history of IBD. Among studies that reported a primary outcome, secondary outcomes were also abstracted if the results were provided among patients with and without a family history of IBD. Secondary outcomes included the prevalence of subtypes of IBD including a family history of UC, CD and indeterminate colitis. Additional secondary outcomes included age at diagnosis, disease location, need for surgery, and extra-intestinal manifestations.

### 2.4. Study characteristics that may modify the outcomes

Study design, definitions of family history and the populations included in the study may modify the observed IBD family history prevalence. We collected information on these potential modifiers so that we could quantify the degree to which these definition and inclusion criteria affected our findings. Data on the definition of family history (first-degree, second-degree, distant relative, or not reported) and study type (cohort [including trial], case-control, and cross-sectional) were abstracted. First-degree relatives were defined as parents, children, or siblings. Second-degree relatives were defined as grandparents, aunts, and uncles but could include parents, children and siblings. Distant relatives were defined as all other types of family relatedness, while a "not reported" category was created for the remaining subset of studies did not provide a definition of family history at all. We did not assess for tests of publication bias, as the majority of included studies were not designed to assess family history and the data was abstracted from demographics tables. For the few studies examining the relationship between family history and outcomes, no meta-analyses were performed.

We hypothesized that younger age at diagnosis may be associated with a greater prevalence of family history. When available, we based this on age at diagnosis and age at enrollment when age at diagnosis was not reported. A study was classified as youth age at onset when the maximum age of the study population was 18 years or less. A study was considered adult for all studies that included any adults at onset, even if some participants may have been diagnosed under the age of 18. When maximum age was not reported, the mean or median age was used to classify the study.

## 2.5. Data extraction

Data extraction was completed by two reviewers. One reviewer extracted relevant information from each included study: type of study, study characteristics (design, year of publication, disease location, family history definition, data collection source), population characteristics (percent of UC vs. CD patients), family history prevalence, and the secondary outcomes of interest. Secondary outcomes were abstracted only if the prevalence of family history was reported. A second reviewer carefully reviewed the first reviewer's data abstraction for errors. Any differences in opinion were resolved through consensus and input from a senior investigator. Throughout the analysis and writing process, data were examined for plausibility and if data abstraction errors were detected, they were fixed.

## 2.6. Statistical analyses

Pooled prevalence estimates for prevalence of family history of IBD, CD and UC were calculated by fitting random effects

models using the method of DerSimonian and Laird. We performed stratified analyses of items that may cause heterogeneity such as study design and definition of family history. All analyses were conducted using Stata, version 11. Analyses were performed stratified by the study characteristics of interest. Confidence intervals were calculated for each estimate as few studies reported confidence intervals in the manuscripts.

Secondary outcome measures including need for surgery, extra-intestinal manifestations and concordance of disease type were not reported frequently enough or with the same definition to allow meta-analyses. Instead, we describe the observed findings from the few studies that provided information for each of these outcomes.

## 3. Results

### 3.1. Study search and selection

The search strategy identified 2179 citations (Fig. 1). Of these, 1934 were excluded after examining the title and abstract. We excluded 12 studies that may have been relevant but were not in English. Study populations that were reported more than once (in two separate articles) were included by choosing the most recent article. After examining the full texts of 246 articles, 71 articles met the inclusion criteria (Table 1).<sup>24–94</sup>

The number of patients represented by these 71 articles was 86,824. Of these, 12 were prospective cohort studies, 29 were retrospective cohort studies, 20 were case-control studies, and 12 were cross-sectional studies. Two studies were reported as both retrospective and prospective cohort

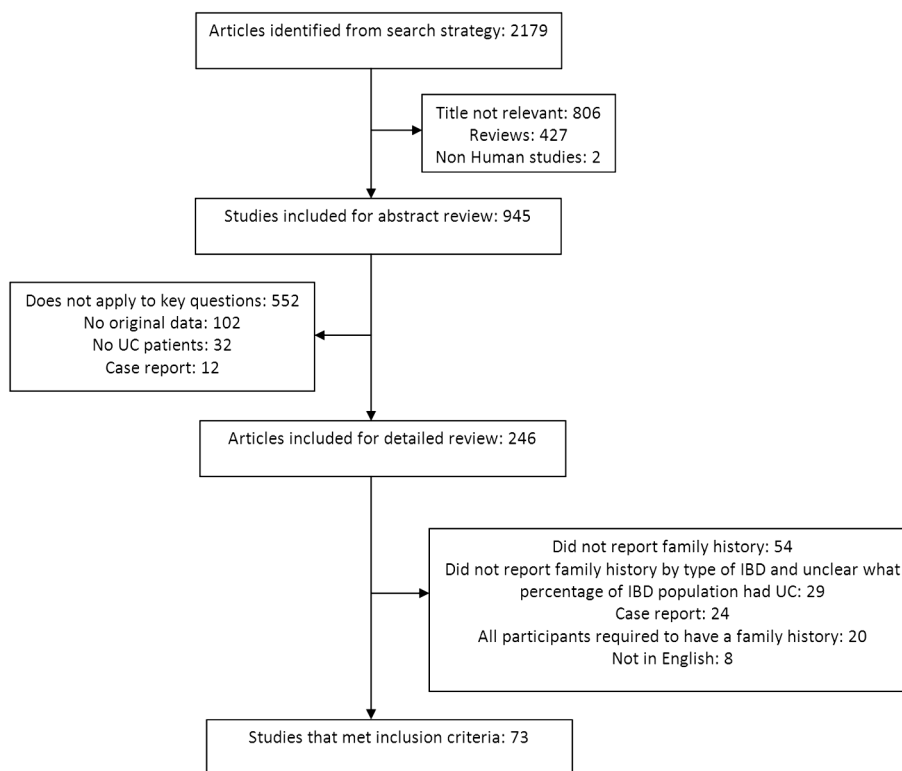

**Figure 1** Flow diagram of assessment of studies in systematic review.

studies,<sup>33,33</sup> and 1 study was reported as both a retrospective and case–control study.<sup>87</sup> No trial or study that aimed to measure genetic risk factors was included.

The source of information used to identify family history for the studies included chart review (22 studies), questionnaires (31 studies), interviews (17 studies), and registry data (3 studies); nine studies did not report an information source; ten studies contained more than one data source (Table 1).

### 3.2. Family history of IBD among UC patients

When the 71 studies were pooled, the overall prevalence of a family history of IBD in UC patients was 12% (95% CI: 11–13%;  $n = 86,824$ ,  $I^2 = 0.002$ ; range 0–39%) (Fig. 2). We found more studies reporting the prevalence of a family history among first-degree relatives of UC patients compared with second-degree or distant relatives of UC patients, but the prevalence was similar whether the family history type was for first-degree relatives, second-degree relatives, distant relatives, or relatives for which the classification was not reported. Study design (cohort, case–control, cross-sectional) had little effect on prevalence estimate, and neither did the method of obtaining family history (chart review, questionnaire, or interview; data not shown).

### 3.3. Age at diagnosis and prevalence of family history

The prevalence of a family history of IBD was calculated by the age at UC diagnosis or study enrollment among patients included in the studies. Thirteen studies exclusively included participants younger than the age of 18 at time of diagnosis or enrollment (Fig. 3). Twenty-eight studies included adults at the time of the study (some of whom may have been pediatric-onset cases) and 31 studies did not report age at diagnosis. We found that studies of UC patients age 18 or younger at enrollment were more likely to have a family history of IBD (prevalence 15%, 95% CI 11–20%,  $I^2 = 0.0051$ ) than studies of UC patients who were older at enrollment (prevalence 11%, 95% CI 9–13%,  $I^2 = 0.0024$ ). Among the 31 studies that did not report age at diagnosis, the prevalence of a family history of IBD among UC patients was 12% (CI 10–14%,  $I^2 = 0.0024$ ; data not shown).

### 3.4. Family history of UC compared with CD among UC patients

Twenty-two studies ( $n = 18,895$ ) reported the prevalence of a family history of UC among UC patients, with an overall prevalence of 9% (CI 3–15%). 18 studies ( $n = 17,262$ ) reported the prevalence of a family history of CD among UC patients, with an overall prevalence of 2% (CI 1–2%). There were no studies that reported data on family history of indeterminate colitis among UC patients.

### 3.5. Family history of IBD and disease location, need for surgery, and extra-intestinal manifestations

Disease location, need for surgery, and extra-intestinal manifestations among UC patients with and without a family history of IBD were reported in seven studies.<sup>34,47,66,70,72,84,93</sup>

There were wide ranges in estimates across studies with little difference in the secondary outcomes between familial and sporadic UC patients. For example, of the five studies reporting data on disease location, four reported a trend toward greater prevalence of pancolitis in patients without a family history of IBD (22–68% pancolitis with family history; 34–76% pancolitis without family history); statistical tests were not conducted in any of these studies.<sup>34,46,65,69</sup> Heterogeneity in definitions for these outcomes prevented meta-analysis.

## 4. Discussion

Among 71 studies involving 86,824 patients, 12% of UC patients have a family history of IBD. Studies with UC patients diagnosed at age 18 or younger reported greater prevalences of a family history of IBD than other studies. UC patients with a family history of IBD may have a higher family history of UC (9%) compared with CD (2%).

The finding that younger UC patients are more likely to have a family history of IBD compared with older UC patients supports existing evidence suggesting that those with a family history of UC have disease onset at a younger age compared with their parents.<sup>19</sup> This finding previously spurred interest in genetic anticipation as a potential contributor to a unique clinical phenotype in UC.<sup>20,21</sup> While observational or ascertainment biases might have accounted for the appearance of genetic anticipation in earlier studies,<sup>22,23</sup> the study by Bengtson suggested that genetic anticipation may indeed play a role in UC.<sup>19</sup> Whether genetic anticipation is occurring or not, the finding that younger UC patients are more likely to have a positive family history of IBD may be important in further research seeking to identify patterns of heritability in polygenetic diseases like IBD.

The apparent increase in family history prevalence may be related to the fact that the actual incidence of IBD is increasing, perhaps due to both genetic and environmental factors, and that increased recognition of IBD family history as an important component of the care of patients and their families has led to more persistent questioning and data gathering by clinicians, and increased interest from researchers.<sup>4,85</sup> GWAS may hold the key for further elucidating our understanding of the polygenic pathways of IBD, including which genes may confer a familial risk.<sup>1,5,9,10</sup> A recent study by Jostins and collaborators showed that there are many shared loci between UC and CD; our study found a higher concordance of a UC family history among UC patients compared to a CD family history, which may suggest that specific loci influence the type of IBD.<sup>5</sup>

Our study also showed no apparent difference in family history prevalence based on degree of family relatedness; this may reflect the variable penetrance of genetic loci suspected to cause UC, or predispose an individual to developing UC. Understanding the UC phenotypes that occur within families may help prioritize the linkage of identified loci with phenotypic variation. Even if gene mapping in IBD ends up having limited clinical application given the polygenetic pathophysiology of the disease, not to mention the uncertain role environmental factors play in pathogenesis, knowing the true overall prevalence of UC in at-risk populations like family members might help clinicians and researchers gauge how

**Table 1** Included studies in meta-analysis.

| Title                                                                                                                             | Author   | Pub Year | Location | Setting                | Study type   | Mean age at diagnosis/study (years) | Family history definition | Family history source            | Family history IBD | UC Pts (N) | Family history UC | Family history CD |
|-----------------------------------------------------------------------------------------------------------------------------------|----------|----------|----------|------------------------|--------------|-------------------------------------|---------------------------|----------------------------------|--------------------|------------|-------------------|-------------------|
| Inflammatory bowel disease in children: epidemiological analysis of the nationwide IBD registry in Japan                          | Ishige   | 2010     | Japan    | Inpatient + outpatient | Cohort       | NR/NR                               | First degree              | Questionnaire                    | NR                 | 52,703     | 3109              | 211               |
| Colorectal cancer rates among first-degree relatives of patients with inflammatory bowel disease: a population-based cohort study | Askling  | 2001     | Sweden   | Inpatient + outpatient | Cohort       | NR/NR                               | First degree              | Chart review + national registry | NR                 | 17,907     | NR                | NR                |
| Family history as a risk factor for colorectal cancer in inflammatory bowel disease                                               | Askling  | 2001     | Sweden   | Outpatient             | Cohort       | NR/NR                               | First degree              | National registry                | NR                 | 10,649     | 714               | 484               |
| An analysis of 10,218 ulcerative colitis cases in China                                                                           | Jiang    | 2002     | China    | Inpatient              | Case-control | 40.7/NR                             | First degree              | NR                               | NR                 | 10,488     | 4                 | NR                |
| Ileostomy in ulcerative colitis. A questionnaire study of 1803 patients                                                           | Morowitz | 1981     | USA      | Inpatient              | Cohort       | NR/42                               | Distant                   | Questionnaire                    | NR                 | 1803       | 240               | NR                |
| Inflammatory bowel disease. An epidemiological and genetic study                                                                  | Monsen   | 1990     | Sweden   | Inpatient              | Cohort       | NR/34                               | Second degree             | Interview                        | NR                 | 1274       | 76                | 65                |
| Familial occurrence of inflammatory bowel disease in Korea                                                                        | Park     | 2006     | Korea    | Inpatient + outpatient | Cohort       | NR/NR                               | First degree              | Questionnaire + interview        | NR                 | 1043       | 21                | 20                |
| Prevalence of inflammatory bowel disease among relatives of patients with ulcerative colitis                                      | Monsen   | 1987     | Sweden   | Population             | Cohort       | NR/NR                               | Distant                   | Interview                        | NR                 | 963        | NR                | 65                |
| Inflammatory Bowel Disease in Children and Adolescents in Italy: Data from the Pediatric National IBD Register (1996–2003)        | Castro   | 2008     | Italy    | Outpatient             | Cohort       | 9.6/NR                              | First degree              | Questionnaire                    | NR                 | 810        | NR                | 713               |

|                                                                                                                                                                           |         |      |             |                        |                 |           |               |               |     |                                              |    |    |
|---------------------------------------------------------------------------------------------------------------------------------------------------------------------------|---------|------|-------------|------------------------|-----------------|-----------|---------------|---------------|-----|----------------------------------------------|----|----|
| Significance of erythema nodosum and pyoderma gangrenosum in inflammatory bowel diseases: a cohort study of 2402 patients                                                 | Farhi   | 2008 | France      | Inpatient              | Cohort          | 33.1/NR   | Distant       | Chart review  | 744 | 52                                           | 36 | 16 |
| Phenotypic and genotypic characteristics of inflammatory bowel disease in French Canadians: comparison with a large North American repository                             | Bhat    | 2009 | USA, Canada | Inpatient + outpatient | Cross-sectional | 30/39     | Second degree | Interview     | 683 | 137                                          | NR | NR |
| Anticipation in inflammatory bowel disease: a phenomenon caused by an accumulation of confounders                                                                         | Hampe   | 2000 | Germany     | Inpatient + outpatient | Cross-sectional | 30.1/42.2 | First degree  | Questionnaire | 667 | 122                                          | NR | NR |
| Clinical Characteristics of Inflammatory Bowel Disease in Turkey A Multicenter Epidemiologic Survey                                                                       | Tozun   | 2009 | Turkey      | Inpatient + outpatient | Cohort          | 42.6/NR   | NR            | Questionnaire | 661 | 29                                           | NR | NR |
| Population-based cases control study of inflammatory bowel disease risk factors                                                                                           | Geary   | 2010 | New Zealand | Population             | Case-control    | NR/NR     | Distant       | Questionnaire | 653 | 106 (first-degree)/101 (all other relatives) | NR | NR |
| Striking elevation in incidence and prevalence of inflammatory bowel disease in a province of western Hungary between 1977–2001                                           | Lakatos | 2004 | Hungary     | Inpatient + outpatient | Cohort          | NR/NR     | Second degree | Chart review  | 560 | 19                                           | NR | NR |
| Epidemiology in inflammatory bowel disease in five areas of Asturias, Spain                                                                                               | Saro    | 2003 | Spain       | Inpatient + outpatient | Cohort          | 43.9/NR   | Second degree | Questionnaire | 565 | 42                                           | NR | NR |
| Association of extraintestinal manifestations of inflammatory bowel disease in a province of western Hungary with disease phenotype: results of a 25-year follow-up study | Lakatos | 2003 | Hungary     | Inpatient + outpatient | Cohort          | 38.3/NR   | Second degree | NR            | 619 | NR                                           | 19 | 5  |

(continued on next page)

Table 1 (continued)

| Title                                                                                                                                                                     | Author          | Pub Year | Location          | Setting    | Study type   | Mean age at diagnosis/study (years) | Family history definition | Family history source     | UC Pts (N) | Family history IBD | Family history UC | Family history CD |
|---------------------------------------------------------------------------------------------------------------------------------------------------------------------------|-----------------|----------|-------------------|------------|--------------|-------------------------------------|---------------------------|---------------------------|------------|--------------------|-------------------|-------------------|
| Prevalence and family risk of ulcerative colitis and Crohn's disease: an epidemiological study among Europeans and south Asians in Leicestershire                         | Orholm          | 1991     | Denmark           | Outpatient | Cohort       | NR/50                               | Second degree             | Questionnaire + interview | 504        | 59                 | 55                | 4                 |
| Familial occurrence of inflammatory bowel disease                                                                                                                         | Torres          | 2003     | USA (Puerto Rico) | Inpatient  | Cohort       | NR/42.6                             | NR                        | Questionnaire             | 499        | 85                 | NR                | NR                |
| Prevalence of inflammatory bowel disease in an insured population in Puerto Rico during 1996                                                                              | Lappalainen     | 2008     | Finland           | Inpatient  | Case-control | NR/NR                               | First degree              | Questionnaire             | 459        | 115                | NR                | NR                |
| Association of IL23R, TNFRSF1A, and HLA-DRB1*0103 allele variants with inflammatory bowel disease phenotypes in the Finnish population                                    | Henriksen       | 2007     | Norway            | Inpatient  | Cohort       | 40.65/NR                            | First degree              | Interview + chart review  | 454        | 46                 | NR                | NR                |
| Are there any differences in phenotype or disease course between familial and sporadic cases of inflammatory bowel disease? Results of a population-based follow-up study | Halme           | 2002     | Finland           | Inpatient  | Cohort       | NR/NR                               | First degree              | Questionnaire             | 436        | 55                 | 45                | 6                 |
| Familial and sporadic inflammatory bowel disease: comparison of clinical features and serological markers in a genetically homogeneous population                         | Triantafyllidis | 1998     | Greece            | Inpatient  | Cohort       | 40.5/52.3                           | Second degree             | Interview                 | 413        | 11                 | NR                | NR                |
| Ulcerative colitis in Greece: clinicoepidemiological data, course, and prognostic factors in 413 consecutive patients                                                     |                 |          |                   |            |              |                                     |                           |                           |            |                    |                   |                   |

|                                                                                                                                                                                            |          |      |         |                        |              |           |               |                          |     |     |    |    |
|--------------------------------------------------------------------------------------------------------------------------------------------------------------------------------------------|----------|------|---------|------------------------|--------------|-----------|---------------|--------------------------|-----|-----|----|----|
| Inflammatory bowel disease characteristics among African Americans, Hispanics, and non-Hispanic Whites: characterization of a large North American cohort                                  | Nguyen   | 2006 | USA     | Inpatient              | Case-control | 26.4/36/1 | Second degree | Chart review             | 396 | 88  | NR | NR |
| Children with early-onset inflammatory bowel disease (IBD): analysis of a pediatric IBD consortium registry                                                                                | Heyman   | 2005 | USA     | Inpatient              | Cohort       | NR/NR     | Distant       | Chart Review + interview | 393 | 114 | NR | NR |
| A case-control study of ulcerative colitis in Japan                                                                                                                                        | Nakamura | 1994 | Japan   | Inpatient              | Case-control | NR/39     | Distant       | Questionnaire            | 384 | NR  | 4  | NR |
| The clinical significance of right-sided colonic inflammation in patients with left-sided chronic ulcerative colitis                                                                       | Mutinga  | 2004 | USA     | Inpatient              | Case-control | 47/NR     | NR            | Chart review             | 352 | 95  | NR | NR |
| Increasing incidences of inflammatory bowel disease and decreasing surgery rates in Copenhagen City and County, 2003–2005: a population-based study from the Danish Crohn colitis database | Vind     | 2006 | Denmark | Inpatient              | Cohort       | NR/NR     | NR            | Chart review             | 326 | 28  | 25 | 3  |
| Study of family history among patients with inflammatory bowel disease                                                                                                                     | Farmer   | 1989 | USA     | Inpatient              | Cohort       | 15/NR     | First degree  | NR                       | 316 | 108 | NR | NR |
| Patients With Late-Adult-Onset Ulcerative Colitis Have Better Outcomes Than Those With Early Onset Disease                                                                                 | Ha       | 2010 | USA     | Outpatient             | Cohort       | 42/42     | Second degree | Chart review             | 295 | 47  | NR | NR |
| Inflammatory bowel disease in children: the role of a positive family history                                                                                                              | Roma     | 2010 | Greece  | Inpatient              | Cohort       | NR/NR     | Distant       | Chart review             | 244 | 16  | NR | NR |
| Epidemiology of ulcerative colitis in western Norway                                                                                                                                       | Haug     | 1988 | Norway  | Inpatient + outpatient | Cohort       | NR/NR     | NR            | NR                       | 239 | 62  | NR | NR |

(continued on next page)



Table 1 (continued)

| Title                                                                                                                     | Author    | Pub Year | Location                                                         | Setting                | Study type   | Mean age at diagnosis/study (years) | Family history definition | Family history source | UC Pts (N) | Family history IBD | Family history UC | Family history CD |
|---------------------------------------------------------------------------------------------------------------------------|-----------|----------|------------------------------------------------------------------|------------------------|--------------|-------------------------------------|---------------------------|-----------------------|------------|--------------------|-------------------|-------------------|
| Familial aggregation of inflammatory bowel disease in a Mediterranean area                                                | Cipolla   | 1996     | Italy                                                            | Inpatient              | Cohort       | NR/NR                               | First degree              | Interview             | 221        | 12                 | NR                | NR                |
| A population-based case control study of potential risk factors for IBD                                                   | Bernstein | 2006     | Canada                                                           | Inpatient + outpatient | Case-control | NR/NR                               | First degree              | Questionnaire         | 217        | 32                 | NR                | NR                |
| Childhood factors in ulcerative colitis and Crohn's disease. An international cooperative study                           | Gilat     | 1987     | USA, Canada, UK, Sweden, Denmark, Holland, France, Italy, Israel | Inpatient + outpatient | Case-control | NR/NR                               | Second degree             | Questionnaire         | 197        | 41                 |                   |                   |
| The incidence of ulcerative colitis in Northern Norway from 1983 to 1986. The Northern Norwegian Gastroenterology Society | Kildebo   | 1990     | Norway                                                           | Inpatient              | Cohort       | NR/NR                               | First degree              | Chart review          | 179        | 18                 | NR                | NR                |
| Risk factors for ulcerative colitis in a Chinese population: an age-matched and sex-matched case-control study            | Jiang     | 2007     | China                                                            | Inpatient              | Case-control | 42.9/NR                             | NR                        | Questionnaire         | 177        | 12                 | NR                | NR                |
| CARD15/NOD2 mutational analysis and genotype-phenotype correlation in 612 patients with inflammatory bowel disease        | Lesage    | 2002     | Belgium, Denmark, France, Germany, Ireland, Italy, Spain, Sweden | NR                     | Case-control | NR/34.5                             | NR                        | Questionnaire         | 159        | NR                 | NR                | NR                |
| Distinct Phenotype of Early Childhood Inflammatory Bowel Disease                                                          | Paul      | 2006     | USA                                                              | Outpatient             | Cohort       | NR/NR                               | Distant                   | Interview             | 151        | NR                 | NR                | NR                |

|                                                                                                                                                      |                |      |         |                        |                 |                      |               |                              |     |     |    |    |
|------------------------------------------------------------------------------------------------------------------------------------------------------|----------------|------|---------|------------------------|-----------------|----------------------|---------------|------------------------------|-----|-----|----|----|
| OCTN and CARD15 gene polymorphism in Chinese patients with inflammatory bowel disease                                                                | Li             | 2008 | China   | Inpatient              | Case-control    | NR/43.8 <sup>a</sup> | Distant       | National registry            | 151 | 2   | NR | NR |
| Prevalence of ulcerative colitis in the Israeli kibbutz population                                                                                   | Niv            | 1991 | Israel  | Outpatient             | Cross-sectional | 35/46                | First degree  | Questionnaire                | 147 | 3   | NR | NR |
| Generational differences in the age at diagnosis with IBD: genetic anticipation, bias, or temporal effects                                           | Faybush        | 2002 | Canada  | Population             | Cross-sectional | 33.4/NR              | Second degree | Questionnaire                | 146 | 146 | NR | NR |
| Preliminary report on the Mount Sinai Hospital Inflammatory Bowel Disease Genetics Project                                                           | McLeod         | 1997 | Canada  | Inpatient              | Cross-sectional | NR/NR                | Second degree | Questionnaire + chart review | 135 | 135 | 96 | 31 |
| A population-based case-control study of CARD15 and other risk factors in Crohn's disease and ulcerative colitis                                     | Brant          | 2007 | Canada  | Inpatient + outpatient | Case-control    | 23.9/37.5            | First degree  | Questionnaire                | 121 | 15  | 10 | 5  |
| Contributions of IBD5, IL23R, ATG16L1, and NOD2 to Crohn's disease risk in a population-based case-control study: evidence of gene-gene interactions | Okazaki        | 2008 | Canada  | Inpatient + outpatient | Case-control    | NR/37.8              | First degree  | Interview                    | 117 | 13  | NR | NR |
| The natural history of pediatric ulcerative colitis: a population-based cohort study                                                                 | Gower-Rousseau | 2009 | France  | Inpatient + outpatient | Cohort          | NR/NR                | First degree  | Questionnaire + interview    | 113 | 13  | 7  | 6  |
| Attitudes toward genetic testing in patients with inflammatory bowel disease                                                                         | Lal            | 2007 | Canada  | Outpatient             | Cross-sectional | 28.2/39.7            | Distant       | Questionnaire                | 108 | 30  | NR | NR |
| Progression of ulcerative proctosigmoiditis: incidence and factors influencing progression                                                           | Ayres          | 1996 | England | Inpatient              | Case-control    | NR/NR                | Distant       | Questionnaire                | 106 | 15  | NR | NR |
| The incidence of inflammatory bowel disease in a rural region of Southern Germany: a Cohort population-based study                                   | Ott            | 2008 | Germany | Inpatient + outpatient | Cohort          | NR/NR                | Distant       | Questionnaire                | 105 | 7   | NR | NR |

(continued on next page)

Table 1 (continued)

| Title                                                                                                                                                                                     | Author      | Pub Year | Location | Setting                | Study type      | Mean age at diagnosis/study (years) | Family history definition | Family history source | UC Pts (N) | Family history IBD | Family history UC | Family history CD |
|-------------------------------------------------------------------------------------------------------------------------------------------------------------------------------------------|-------------|----------|----------|------------------------|-----------------|-------------------------------------|---------------------------|-----------------------|------------|--------------------|-------------------|-------------------|
| Autoimmune Disorders and Extraintestinal Manifestations in First-degree Familial and Sporadic Inflammatory Bowel Disease A Case—Control Study                                             | Ricart      | 2004     | USA      | Outpatient             | Case—control    | NR/39 <sup>a</sup>                  | First degree              | Questionnaire         | 104        | 22                 | 21                | 1                 |
| Familial empiric risk estimates of inflammatory bowel disease in Ashkenazi Jews                                                                                                           | Roth        | 1989     | USA      | Outpatient             | Cohort          | NR/NR                               | Distant                   | Interview             | 101        | 20                 | NR                | NR                |
| Familial prevalence in chronic intestinal inflammatory disease. Differences among groups of patients with and without a familial history                                                  | Nos         | 1996     | Spain    | Inpatient + outpatient | Cross-sectional | NR/32                               | First degree              | NR                    | 88         | 11                 | NR                | NR                |
| Natural history of pediatric inflammatory bowel diseases over a 5-year follow-up: a Cohort review of data from the register of pediatric inflammatory bowel diseases                      | Newby       | 2008     | England  | Inpatient              | Cohort          | NR/11.9 <sup>a</sup>                | First degree              | Chart review          | 74         | 6                  | 6                 | 0                 |
| Predicting the need for colectomy in pediatric patients with ulcerative colitis                                                                                                           | Falcone, Jr | 2000     | USA      | Inpatient              | Cohort          | 11.3/NR                             | NR                        | Chart review          | 73         | 9                  | NR                | NR                |
| Age and family history at presentation of pediatric inflammatory bowel disease                                                                                                            | Weinstein   | 2003     | USA      | Inpatient              | Cohort          | 10.7/14                             | Second degree             | Chart review          | 71         | 19                 | NR                | NR                |
| 1007 fs, G908R, R702W mutations and P268S, IV58 + 158 polymorphisms of the CARD15 gene in Turkish inflammatory bowel disease patients and their relationship with disease-related surgery | Ince        | 2008     | Turkey   | Inpatient              | Case—control    | NR/43                               | Second degree             | NR                    | 63         | 4                  | NR                | NR                |

| Environmental risk factors in pediatric inflammatory bowel diseases: a population based case control study                                                              | 2005 | France      | Baron      | 2003 | USA       | Kugathasan | Population             | Case-control    | NR/NR   | First degree  | Interview     | 60 | 15 | NR | NR |
|-------------------------------------------------------------------------------------------------------------------------------------------------------------------------|------|-------------|------------|------|-----------|------------|------------------------|-----------------|---------|---------------|---------------|----|----|----|----|
| Epidemiologic and clinical characteristics of children with newly diagnosed inflammatory bowel disease in Wisconsin: a statewide population-based study                 | 1997 | Netherlands | Bouma      | 2008 | Italy     | Simondi    | Inpatient              | Case-control    | 35/NR   | NR            | Chart review  | 59 | 9  | NR | NR |
| Evidence for genetic heterogeneity in inflammatory bowel disease (IBD); HLA genes in the predisposition to suffer from ulcerative colitis (UC) and Crohn's disease (CD) | 2008 | Italy       | Simondi    | 2003 | Turkey    | Tezel      | Outpatient             | Case-control    | NR/47   | First degree  | NR            | 53 | 3  | NR | NR |
| Antigliyan antibodies as serological markers in the differential diagnosis of inflammatory bowel disease                                                                | 2003 | Turkey      | Tezel      | 2003 | Sweden    | Hildebrand | Inpatient              | Cross-sectional | NR/41   | NR            | Chart review  | 49 | NR | 2  | NR |
| Changing pattern of ulcerative colitis in Trakya, Turkey                                                                                                                | 2003 | Sweden      | Hildebrand | 2004 | Spain     | Garrido    | Inpatient              | Cohort          | 12.8/NR | Second degree | NR            | 45 | 5  | 4  | 3  |
| pediatric inflammatory bowel disease in northern Stockholm 1990-2001                                                                                                    | 2004 | Spain       | Garrido    | 1993 | USA       | Gryboski   | Inpatient + outpatient | Cohort          | 44.7/NR | First degree  | Chart review  | 40 | 1  | NR | NR |
| Epidemiology of chronic inflammatory bowel disease in the Northern Area of Huelva                                                                                       | 1993 | USA         | Gryboski   | 2000 | Singapore | Lee        | Inpatient              | Cohort          | 5.4/NR  | Distant       | Chart review  | 38 | 9  | 2  | 2  |
| Ulcerative colitis in children 10 years old or younger                                                                                                                  | 2000 | Singapore   | Lee        |      |           |            | Inpatient              | Cross-sectional | NR/NR   | First degree  | Questionnaire | 37 | 0  | NR | NR |
| Racial differences in the prevalence of ulcerative colitis and Crohn's disease in Singapore                                                                             |      |             |            |      |           |            |                        |                 |         |               |               |    |    |    |    |

(continued on next page)

Table 1 (continued)

| Title                                                                                                                    | Author     | Pub Year | Location | Setting                | Study type      | Mean age at diagnosis/<br>study (years) | Family history definition | Family history source | UC Pts (N) | Family history IBD | Family history UC | Family history CD |
|--------------------------------------------------------------------------------------------------------------------------|------------|----------|----------|------------------------|-----------------|-----------------------------------------|---------------------------|-----------------------|------------|--------------------|-------------------|-------------------|
| Crohn's disease and ulcerative colitis are associated with the DNA repair gene MLH1                                      | Pokorny    | 1997     | USA      | Inpatient              | Case-control    | NR/43                                   | NR                        | NR                    | 36         | 7                  | NR                | NR                |
| Paramyxovirus infections in childhood and subsequent inflammatory bowel disease                                          | Montgomery | 1999     | England  | Inpatient + outpatient | Cross-sectional | NR/NR                                   | First degree              | Interview             | 17         | 1                  | NR                | NR                |
| Characteristics and trends in the incidence of inflammatory bowel disease in Korean children: a single-center experience | Kim        | 2010     | Korea    | Inpatient              | Cohort          | 12.6/NR                                 | First degree              | Chart review          | 14         | 1                  | 1                 | 0                 |

<sup>a</sup> Median age at time of study, rather than mean age at time of study.

much time and resources should be invested in clinical surveillance or allow clinicians to use family history as a biomarker until clinically useful genetic panels are developed.

There were limitations in the identified data and our process. Table 1 shows the complete listing of included studies; as with any large sample of studies, confounders such as differences in study design, number of patients, year(s) of study duration, and location exist. Furthermore, many studies did not define family history or its source. We did, however, stratify our results based the family history types and sources that were reported, and we found no statistical difference in family history prevalence based on study data source or study type. Future studies should clarify how data on important risk factors, like family history, are collected.

Lack of reporting of time-to-event data prevented the examination of the role that family history may play in the natural history of disease. If family history modifies disease course, targeted treatment strategies could be examined for those with a family history. Stratification of family history by age was not performed in any study, so we classified studies according to age at enrollment instead of age at diagnosis. Family history among adult-onset UC patients may be even lower than the observed 11% due to the inclusion of an unknown number of youth-onset UC patients in some of these studies. Finally, we were unable to locate studies containing sufficient data with similarly reported outcomes to perform additional meta-analyses examining the relationship between family history and concordance of location, need for surgery, or presence of extra-intestinal manifestations.<sup>11-18,61,65,79</sup>

Although a family history of IBD among patients with a diagnosis of UC or CD has been known to exist for over 30 years, most previous studies have focused on family history in patients with CD rather than UC. We found that

the prevalence of a family history of IBD among UC patients was 12%. This prevalence is robust to definitions of family history and study design. Younger UC patients are more likely to have a family history of IBD compared with older UC patients. UC patients were more likely to have a family history of UC compared with CD. There remains very little information on the role of family history on need for surgery, extra-intestinal manifestations, concordance of disease type (UC, CD, or indeterminate colitis), and disease location of UC as it relates to family history. Future studies should seek to identify the concordance of phenotype and age at diagnosis in familial UC.

**Disclosures**

The authors have no disclosures or conflicts of interest relevant to this manuscript.

**Acknowledgment**

We would like to acknowledge Yuval Patel, MD for his assistance with abstract review. A grant from Proctor & Gamble provided support for data analysis. Proctor & Gamble was not involved in the design, analysis, interpretation or decision to submit this study for publication.

RC participated in study concept and design, interpretation of data, drafting of manuscript, and critical revision of manuscript.

SE participated in study concept and design, acquisition of data, interpretation of data, drafting of manuscript, and critical revision of manuscript.

CV participated in acquisition of data.

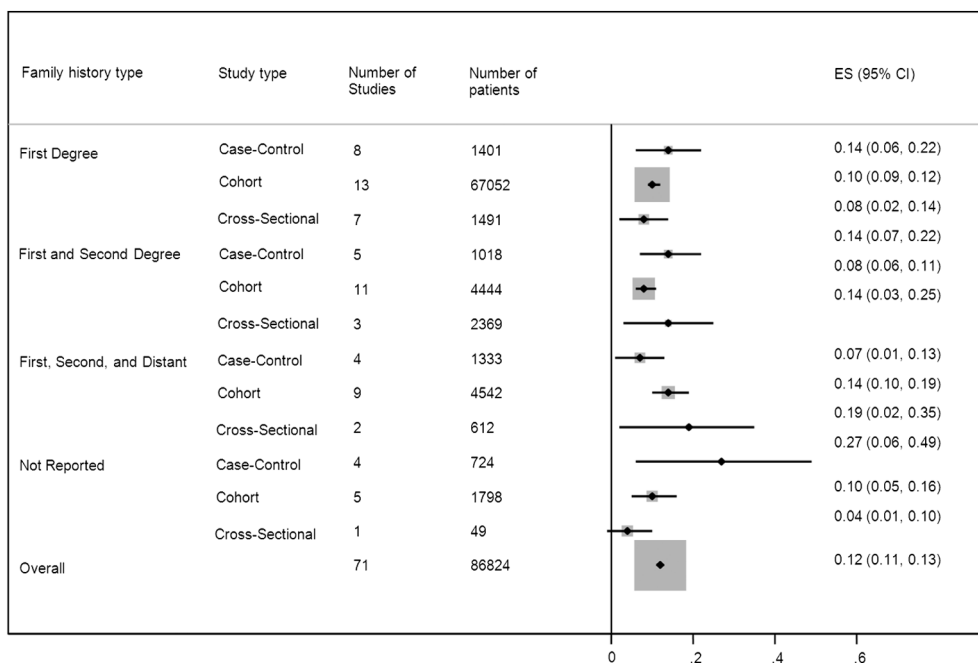

**Figure 2** Prevalence of family history among UC patients by definition of family history and study type. The overall prevalence of a family history of IBD in UC patients was 12%.

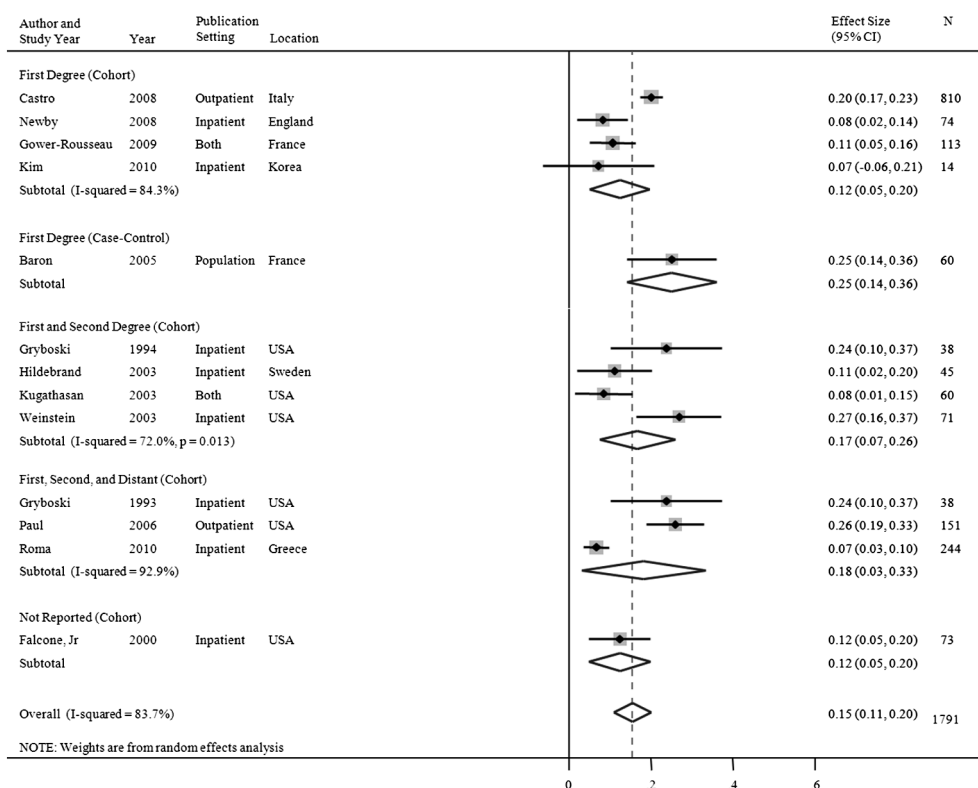

**Figure 3** Prevalence of family history among UC patients age 18 years or less. UC patients age 18 or younger were more likely to have a family history of IBD (prevalence 15%) than studies including adult UC patients (prevalence 11%).

RW participated in study concept and design, acquisition of data, interpretation of data, statistical analysis, and drafting of the manuscript.

TB participated in critical revision of the manuscript.

SH participated in study concept and design, acquisition of data, interpretation of data, statistical analysis, drafting of manuscript, and critical revision of manuscript.

### Appendix A. Supplementary data

Supplementary data to this article can be found online at <http://dx.doi.org/10.1016/j.crohns.2014.05.008>.

### References

- Halme L, Paavola-Sakki P, Turunen U, Lappalainen M, Farkkila M, Kontula K. Family and twin studies in inflammatory bowel disease. *World J Gastroenterol* Jun 21 2006;12(23):3668–72.
- Maratka Z, Será J. Familiar occurrence of ulcerative colitis. *Gastroenterologia* 1965;103(5):321–5.
- Binder V, Weeke E, Olsen JH, Anthonisen P, Riis P. A genetic study of ulcerative colitis. *Scand J Gastroenterol* 1966;1(1): 49–56.
- Brant SR. Update on the heritability of inflammatory bowel disease: the importance of twin studies. *Inflamm Bowel Dis* 2011;17:1–5.
- Jostins L, Ripke S, Weersma RK, Duerr RH, McGovern DP, Hui KY, et al. Host-microbe interactions have shaped the genetic architecture of inflammatory bowel disease. *Nature* Nov 1 2012;491(7422):119–24.

- Franko A, McGovern DP, Barrett JC, Wang K, Radford-Smith GL, Ahmad T, et al. Genome-wide meta-analysis increases to 71 the number of confirmed Crohn's disease susceptibility loci. *Nat Genet* 2010;42:1118–25.
- McGovern DP, Gardet A, Törkvist L, Goyette P, Essers J, Taylor KD, et al. Genome-wide association identifies multiple ulcerative colitis susceptibility loci. *Nat Genet* 2010;42(4): 332–7.
- Anderson CA, Boucher G, Lees CW, Franke A, D'Amato M, Taylor KD, et al. Meta-analysis identifies 29 additional ulcerative colitis risk loci, increasing the number of confirmed associations to 47. *Nat Genet* 2011;43:246–52.
- Satsangi J, Jewell DP, Bell JI. The genetics of inflammatory bowel disease. *Gut* May 1997;40(5):572–4.
- Jess T, Riis L, Jespersgaard C, Hougs L, Andersen PS, Orholm MK, et al. Disease concordance, zygosity, and NOD2/CARD15 status: follow-up of a population-based cohort of Danish twins with inflammatory bowel disease. *Am J Gastroenterol* 2005;100: 2486–92.
- Annese V, Andreoli A, Astegiano M, Campieri M, Caprilli R, Cucchiara S, et al. Italian study group for the disease of colon and rectum. Italian Study group for the disease of colon and rectum. Clinical features in familial cases of Crohn's disease and ulcerative colitis in Italy: a GISC study. Italian study group for the disease of colon and rectum. *Am J Gastroenterol* Oct 2001;96(10):2939–45.
- Lee JC, Bridger S, McGregor C, Macpherson AJ, Jones JE. Why children with inflammatory bowel disease are diagnosed at a younger age than their affected parent. *Gut* Jun 1999;44(6): 808–11.
- Picco MF, Goodman S, Reed J, Bayless TM. Methodologic pitfalls in the determination of genetic anticipation: the case of Crohn disease. *Ann Intern Med* Jun 19 2001;134(12):1124–9.

14. Satsangi J, Grootcholten C, Holt H, Jewell DP. Clinical patterns of familial inflammatory bowel disease. *Gut* May 1996;**38**(5): 738–41.
15. Peeters M, Cortot A, Vermeire S, Colombel JF. Familial and sporadic inflammatory bowel disease: different entities? *Inflamm Bowel Dis* 2000;**6**(4):314–20.
16. Peeters M, Nevens H, Baert F, Hiele M, de Meyer AM, Vlietinck R, et al. Familial aggregation in Crohn's disease: increased age-adjusted risk and concordance in clinical characteristics. *Gastroenterology* 1996;**111**:597–603.
17. Colombel JF, Grandbastien B, Gower-Rousseau C, Plegat S, Evrard JP, Dupas JL, et al. Clinical characteristics of Crohn's disease in 72 families. *Gastroenterology* 1996;**111**:604–7.
18. Bayless TM, Tokayer AZ, Polito 2nd JM, Quaskey SA, Mellits ED, Harris ML. Crohn's disease: concordance for site and clinical type in affected family members—potential hereditary influences. *Gastroenterology* 1996;**111**(3):573–9.
19. Clustering in time of familial IBD separates ulcerative colitis from Crohn's disease. *Inflamm Bowel Dis* Dec 2009;**15**(12): 1867–74.
20. Grandbastien B, Peeters M, Franchimont D, Gower-Rousseau C, Speckel D, Rutgeerts P, et al. Anticipation in familial Crohn's disease. *Gut* 1998;**42**:170–4.
21. Bayless TM, Picco MF, Labuda MC. Genetic anticipation in Crohn's disease. *Lancet* 1996;**347**:798–800.
22. Lee JC, Bridger S, McGregor C, Macpherson AJ, Jones JE. Why children with inflammatory bowel disease are diagnosed at a younger age than their affected parent. *Gut* Jun 1999;**44**(6): 808–11.
23. Picco MF, Goodman S, Reed J, Bayless TM. Methodologic pitfalls in the determination of genetic anticipation: the case of Crohn disease. *Ann Intern Med* Jun 19 2001;**134**(12):1124–9.
32. Garrido A, Martínez MJ, Ortega JA, Lobato A, Rodríguez MJ, Guerrero FJ. Epidemiology of chronic inflammatory bowel disease in the Northern area of Huelva. *Rev Esp Enferm Dig* Oct 2004;**96**(10):687–91 [691–4].
33. Castro M, Papadatou B, Baldassare M, Balli F, Barabino A, Barbera C, et al. Inflammatory bowel disease in children and adolescents in Italy: data from the pediatric national IBD register (1996–2003). *Inflamm Bowel Dis* Sep 2008;**14**(9): 1246–52.
34. Ricart E, Panaccione R, Loftus Jr EV, Tremaine WJ, Harmsen WS, Zinsmeister AR, et al. Autoimmune disorders and extraintestinal manifestations in first-degree familial and sporadic inflammatory bowel disease: a case–control study. *Inflamm Bowel Dis* May 2004;**10**(3):207–14.
35. Roth MP, Petersen GM, McElree C, Vadheim CM, Panish JF, Rotter JI. Familial empiric risk estimates of inflammatory bowel disease in Ashkenazi Jews. *Gastroenterology* Apr 1989;**96**(4): 1016–20.
36. Geary RB, Richardson AK, Frampton CM, Dodgshun AJ, Barclay ML. Population-based cases control study of inflammatory bowel disease risk factors. *J Gastroenterol Hepatol* Feb 2010;**25**(2): 325–33 [Epub 2010 Jan 14].
37. Ott C, Obermeier F, Thieler S, Kemptner D, Bauer A, Schölmerich J, et al. The incidence of inflammatory bowel disease in a rural region of Southern Germany: a prospective population-based study. *Eur J Gastroenterol Hepatol* Sep 2008;**20**(9):917–23.
38. Newby EA, Croft NM, Green M, Hassan K, Heuschkel RB, Jenkins H, et al. Natural history of paediatric inflammatory bowel diseases over a 5-year follow-up: a retrospective review of data from the register of paediatric inflammatory bowel diseases. *J Pediatr Gastroenterol Nutr* May 2008;**46**(5):539–45.
39. Gower-Rousseau C, Dauchet L, Vernier-Massouille G, Tilloy E, Brazier F, Merle V, et al. The natural history of pediatric ulcerative colitis: a population-based cohort study. *Am J Gastroenterol* Aug 2009;**104**(8):2080–8.
40. Park JB, Yang SK, Byeon JS, Park ER, Moon G, Myung SJ, et al. Familial occurrence of inflammatory bowel disease in Korea. *Inflamm Bowel Dis* Dec 2006;**12**(12):1146–51.
41. Heyman MB, Kirschner BS, Gold BD, Ferry G, Baldassano R, Cohen SA, et al. Children with early-onset inflammatory bowel disease (IBD): analysis of a pediatric IBD consortium registry. *J Pediatr* Jan 2005;**146**(1):35–40.
42. Ishige T, Tomomasa T, Takebayashi T, Asakura K, Watanabe M, Suzuki T, et al. Inflammatory bowel disease in children: epidemiological analysis of the nationwide IBD registry in Japan. *J Gastroenterol* Sep 2010;**45**(9):911–7.
43. Falcone Jr RA, Lewis LG, Warner BW. Predicting the need for colectomy in pediatric patients with ulcerative colitis. *J Gastrointest Surg* Mar-Apr 2000;**4**(2):201–6.
44. Morowitz DA, Kirsner JB. Ileostomy in ulcerative colitis. A questionnaire study of 1,803 patients. *Am J Surg* Mar 1981;**141**(3):370–5.
45. Askling J, Dickman PW, Karlén P, Broström O, Lapidus A, Löfberg R, et al. Colorectal cancer rates among first-degree relatives of patients with inflammatory bowel disease: a population-based cohort study. *Lancet* Jan 27 2001;**357**(9252): 262–6.
46. Bernstein CN, Rawsthorne P, Cheang M, Blanchard JF. A population-based case control study of potential risk factors for IBD. *Am J Gastroenterol* May 2006;**101**(5):993–1002.
47. Roma ES, Panayiotou J, Pachoula J, Constantinidou C, Polyzos A, Zellos A, et al. Inflammatory bowel disease in children: the role of a positive family history. *Eur J Gastroenterol Hepatol* Jun 2010;**22**(6):710–5.
48. Lakatos L, Mester G, Erdelyi Z, Balogh M, Szipocs I, Kamaras G, et al. Striking elevation in incidence and prevalence of inflammatory bowel disease in a province of western Hungary

## Meta-analysis references

24. Askling J, Dickman PW, Karlén P, Broström O, Lapidus A, Löfberg R, et al. Family history as a risk factor for colorectal cancer in inflammatory bowel disease. *Gastroenterology* May 2001;**120**(6):1356–62.
25. Brant SR, Wang MH, Rawsthorne P, Sargent M, Datta LW, Nouvet F, et al. A population-based case–control study of CARD15 and other risk factors in Crohn's disease and ulcerative colitis. *Am J Gastroenterol* Feb 2007;**102**(2):313–23.
26. Kim BJ, Song SM, Kim KM, Lee YJ, Rhee KW, Jang JY, et al. Characteristics and trends in the incidence of inflammatory bowel disease in Korean children: a single-center experience. *Dig Dis Sci* Jul 2010;**55**(7):1989–95 [Epub 2009 Sep 10].
27. Weinstein TA, Levine M, Pettei MJ, Gold DM, Kessler BH, Levine JJ. Age and family history at presentation of pediatric inflammatory bowel disease. *J Pediatr Gastroenterol Nutr* Nov 2003;**37**(5):609–13.
28. Jiang L, Xia B, Li J, Ye M, Deng C, Ding Y, et al. Risk factors for ulcerative colitis in a Chinese population: an age-matched and sex-matched case–control study. *J Clin Gastroenterol* Mar 2007;**41**(3):280–4.
29. Ha CY, Newberry RD, Stone CD, Ciorba MA. Patients with late-adult-onset ulcerative colitis have better outcomes than those with early onset disease. *Clin Gastroenterol Hepatol* Aug 2010;**8**(8):682–7 [e1. Epub 2010 Apr 2].
30. Paul T, Birnbaum A, Pal DK, Pittman N, Ceballos C, LeLeiko NS, et al. Distinct phenotype of early childhood inflammatory bowel disease. *J Clin Gastroenterol* Aug 2006;**40**(7):583–6.
31. Tozun N, Atug O, Imeryuz N, Hamzaoglu HO, Tiftikci A, Parlak E, et al. Members of the Turkish IBD Study Group. Clinical characteristics of inflammatory bowel disease in Turkey: a multicenter epidemiologic survey. *J Clin Gastroenterol* Jan 2009;**43**(1):51–7.



- between 1977–2001. *World J Gastroenterol* Feb 1 2004;**10**(3): 404–9.
49. Bhat M, Nguyen GC, Pare P, Lahaie R, Deslandres C, Bernard EJ, et al. Phenotypic and genotypic characteristics of inflammatory bowel disease in French Canadians: comparison with a large North American repository. *Am J Gastroenterol* Sep 2009;**104**(9): 2233–40.
  50. Mutinga ML, Odze RD, Wang HH, Hornick JL, Farraye FA. The clinical significance of right-sided colonic inflammation in patients with left-sided chronic ulcerative colitis. *Inflamm Bowel Dis* May 2004;**10**(3):215–9.
  51. Li M, Gao X, Guo CC, Wu KC, Zhang X, Hu PJ. OCTN and CARD15 gene polymorphism in Chinese patients with inflammatory bowel disease. *World J Gastroenterol* Aug 21 2008;**14**(31): 4923–7.
  52. Lappalainen M, Halme L, Turunen U, Saavalainen P, Einarsdottir E, Färkkilä M, et al. Association of IL23R, TNFRSF1A, and HLA-DRB1\*0103 allele variants with inflammatory bowel disease phenotypes in the Finnish population. *Inflamm Bowel Dis* Aug 2008;**14**(8):1118–24.
  53. Lee YM, Fock K, See SJ, Ng TM, Khor C, Teo EK. Racial differences in the prevalence of ulcerative colitis and Crohn's disease in Singapore. *J Gastroenterol Hepatol* Jun 2000;**15**(6): 622–5.
  54. Pokorny RM, Hofmeister A, Galandiuk S, Dietz AB, Cohen ND, Neiberger HL. Crohn's disease and ulcerative colitis are associated with the DNA repair gene MLH1. *Ann Surg* Jun 1997;**225**(6): 718–23 [discussion 723–5].
  55. Lesage S, Zouali H, Cézard JP, Colombel JF, Belaiche J, Almer S, et al. EPWG-IBD Group; EPIMAD Group; GETAID Group. CARD15/NOD2 mutational analysis and genotype–phenotype correlation in 612 patients with inflammatory bowel disease. *Am J Hum Genet* Apr 2002;**70**(4):845–57.
  56. Baron S, Turck D, Leplat C, Merle V, Gower-Rousseau C, Marti R, et al. Environmental risk factors in paediatric inflammatory bowel diseases: a population based case control study. *Gut* Mar 2005;**54**(3):357–63.
  57. Vind I, Riis L, Jess T, Knudsen E, Pedersen N, Elkjaer M, et al. DCCD study group. Increasing incidences of inflammatory bowel disease and decreasing surgery rates in Copenhagen City and County, 2003–2005: a population-based study from the Danish Crohn colitis database. *Am J Gastroenterol* Jun 2006;**101**(6): 1274–82.
  58. Nguyen GC, Torres EA, Regueiro M, Bromfield G, Bitton A, Stempak J, et al. Inflammatory bowel disease characteristics among African Americans, Hispanics, and non-Hispanic Whites: characterization of a large North American cohort. *Am J Gastroenterol* May 2006;**101**(5):1012–23.
  59. Hildebrand H, Finkel Y, Grahnquist L, Lindholm J, Ekbohm A, Askling J. Changing pattern of paediatric inflammatory bowel disease in northern Stockholm 1990–2001. *Gut* Oct 2003;**52**(10):1432–4.
  60. Jiang XL, Cui HF. An analysis of 10218 ulcerative colitis cases in China. *World J Gastroenterol* Feb 2002;**8**(1):158–61.
  61. Lakatos L, Pandur T, David G, Balogh Z, Kuronya P, Tollas A, et al. Association of extraintestinal manifestations of inflammatory bowel disease in a province of western Hungary with disease phenotype: results of a 25-year follow-up study. *World J Gastroenterol* Oct 2003;**9**(10):2300–7.
  62. Farmer RG. Study of family history among patients with inflammatory bowel disease. *Scand J Gastroenterol Suppl* 1989;**170**:64–5 [discussion 66–8].
  63. Lal S, Appelton J, Mascarenhas J, Stempak JM, Esplen MJ, Silverberg MS. Attitudes toward genetic testing in patients with inflammatory bowel disease. *Eur J Gastroenterol Hepatol* Apr 2007;**19**(4):321–7.
  64. Cipolla C, Magliocco A, Oliva L, Cottone M. Familial aggregation of inflammatory bowel disease in a Mediterranean area. *Eur J Epidemiol* Apr 1996;**12**(2):205–10.
  65. Gryboski JD. Crohn's disease in children 10 years old and younger: comparison with ulcerative colitis. *J Pediatr Gastroenterol Nutr* Feb 1994;**18**(2):174–82.
  66. Halme L, Turunen U, Heliö T, Paavola P, Walle T, Miettinen A, et al. Familial and sporadic inflammatory bowel disease: comparison of clinical features and serological markers in a genetically homogeneous population. *Scand J Gastroenterol* Jun 2002;**37**(6):692–8.
  67. Nakamura Y, Labarthe DR. A case–control study of ulcerative colitis with relation to smoking habits and alcohol consumption in Japan. *Am J Epidemiol* Nov 15 1994;**140**(10):902–11.
  68. Ayres RC, Gillen CD, Walmsley RS, Allan RN. Progression of ulcerative proctosigmoiditis: incidence and factors influencing progression. *Eur J Gastroenterol Hepatol* Jun 1996;**8**(6):555–8.
  69. Farhi D, Cosnes J, Zizi N, Chosidow O, Seksik P, Beaugerie L, et al. Significance of erythema nodosum and pyoderma gangrenosum in inflammatory bowel diseases: a cohort study of 2402 patients. *Medicine (Baltimore)* Sep 2008;**87**(5):281–93.
  70. Henriksen M, Jahnsen J, Lygren I, Vatn MH, Moum B, IBSEN Study Group. Are there any differences in phenotype or disease course between familial and sporadic cases of inflammatory bowel disease? Results of a population-based follow-up study. *Am J Gastroenterol* Sep 2007;**102**(9):1955–63.
  71. Simondi D, Mengozzi G, Betteto S, Bonardi R, Ghignone RP, Fagoonee S, et al. Antiglycan antibodies as serological markers in the differential diagnosis of inflammatory bowel disease. *Inflamm Bowel Dis* May 2008;**14**(5):645–51.
  72. Hampe J, Heymann K, Kruis W, Raedler A, Fölsch UR, Schreiber S. Anticipation in inflammatory bowel disease: a phenomenon caused by an accumulation of confounders. *Am J Med Genet* May 29 2000;**92**(3):178–83.
  73. Okazaki T, Wang MH, Rawsthorne P, Sargent M, Datta LW, Shugart YY, et al. Contributions of IBD5, IL23R, ATG16L1, and NOD2 to Crohn's disease risk in a population-based case–control study: evidence of gene–gene interactions. *Inflamm Bowel Dis* Nov 2008;**14**(11):1528–41.
  74. Ince AT, Hatirnaz O, Ovünç O, Ozbek U. 1007 fs, G908R, R702W mutations and P268S, IVS8 + 158 polymorphisms of the CARD15 gene in Turkish inflammatory bowel disease patients and their relationship with disease-related surgery. *Dig Dis Sci* Jun 2008;**53**(6):1683–92.
  75. Montgomery SM, Morris DL, Pounder RE, Wakefield AJ. Paramyxovirus infections in childhood and subsequent inflammatory bowel disease. *Gastroenterology* Apr 1999;**116**(4):796–803.
  76. Kugathasan S, Judd RH, Hoffmann RG, Heikenen J, Telega G, Khan F, et al. Epidemiologic and clinical characteristics of children with newly diagnosed inflammatory bowel disease in Wisconsin: a statewide population-based study. *J Pediatr* Oct 2003;**143**(4):525–31.
  77. Faybush EM, Blanchard JF, Rawsthorne P, Bernstein CN. Generational differences in the age at diagnosis with IBD: genetic anticipation, bias, or temporal effects. *Am J Gastroenterol* Mar 2002;**97**(3):636–40.
  78. Bouma G, Oudkerk Pool M, Crusius JB, Schreuder GM, Hellemans HP, Meijer BU, et al. Evidence for genetic heterogeneity in inflammatory bowel disease (IBD); HLA genes in the predisposition to suffer from ulcerative colitis (UC) and Crohn's disease (CD). *Clin Exp Immunol* Jul 1997;**109**(1):175–9.
  79. Orholm M, Iselius L, Sørensen TI, Munkholm P, Langholz E, Binder V. Investigation of inheritance of chronic inflammatory bowel diseases by complex segregation analysis. *BMJ* Jan 2 1993;**306**(6869):20–4.
  80. Niv Y, Abukasis G. Prevalence of ulcerative colitis in the Israeli kibbutz population. *J Clin Gastroenterol* Feb 1991;**13**(1):98–101.
  81. Tezel A, Dökmeci G, Eskiocak M, Umit H, Soylu AR. Epidemiological features of ulcerative colitis in Trakya, Turkey. *J Int Med Res* Mar-Apr 2003;**31**(2):141–8.
  82. McLeod RS, Steinhart AH, Siminovitch KA, Greenberg GR, Bull SB, Blair JE, et al. Preliminary report on the Mount Sinai

- Hospital Inflammatory Bowel Disease Genetics Project. *Dis Colon Rectum* May 1997;40(5):553–7.
83. Probert CS, Jayanthi V, Hughes AO, Thompson JR, Wicks AC, Mayberry JF. Prevalence and family risk of ulcerative colitis and Crohn's disease: an epidemiological study among Europeans and south Asians in Leicestershire. *Gut* Nov 1993;34(11):1547–51.
  84. Monsén U, Broström O, Nordenvall B, Sörstad J, Hellers G. Prevalence of inflammatory bowel disease among relatives of patients with ulcerative colitis. *Scand J Gastroenterol* Mar 1987;22(2):214–8.
  85. Orholm M, Munkholm P, Langholz E, Nielsen OH, Sørensen TI, Binder V. Familial occurrence of inflammatory bowel disease. *N Engl J Med* Jan 10 1991;324(2):84–8.
  86. Torres EA, De Jesús R, Pérez CM, Iñesta M, Torres D, Morell C, et al. Prevalence of inflammatory bowel disease in an insured population in Puerto Rico during 1996. *P R Health Sci J* Sep 2003;22(3):253–8.
  87. Saro Gismera C, Riestra Menéndez S, Sánchez Fernández R, Milla Crespo A, Lacort Fernández M, Argüelles Fernández G, et al. Epidemiology in inflammatory bowel disease in five areas of Asturias, Spain. *An Med Interna* May 2003;20(5):232–8.
  88. Haug K, Schrumpf E, Barstad S, Fluge G, Halvorsen JF. Epidemiology of ulcerative colitis in western Norway. *Scand J Gastroenterol* Jun 1988;23(5):517–22.
  89. Kildebo S, Nordgaard K, Aronsen O, Breckan R, Burhol PG, Jorde R. The incidence of ulcerative colitis in Northern Norway from 1983 to 1986. The Northern Norwegian Gastroenterology Society. *Scand J Gastroenterol* Sep 1990;25(9):890–6.
  90. Gryboski JD. Crohn's disease in children 10 years old and younger: comparison with ulcerative colitis. *J Pediatr Gastroenterol Nutr* Feb 1994;18(2):174–82.
  91. Triantafyllidis JK, Emmanouilidis A, Manousos ON, Pomonis E, Tsitsa C, Cheracakis P, et al. Ulcerative colitis in Greece: clinicoepidemiological data, course, and prognostic factors in 413 consecutive patients. *J Clin Gastroenterol* Oct 1998;27(3):204–10.
  92. Gilat T, Hacoheh D, Lilos P, Langman MJ. Childhood factors in ulcerative colitis and Crohn's disease. An international cooperative study. *Scand J Gastroenterol* Oct 1987;22(8):1009–24.
  93. Monsén U. Inflammatory bowel disease. An epidemiological and genetic study. *Acta Chir Scand Suppl* 1990;559:1–42.
  94. Nos P, Argüello L, Hoyos M, Ramírez JJ, Hinojosa J, Molés JR, et al. Familial prevalence in chronic intestinal inflammatory disease. Differences among groups of patients with and without a familial history. *Rev Esp Enferm Dig* Jul 1996;88(7):470–4.
